# Supplementary material for: Sound change in Aboriginal Australia: word-initial engma deletion in Kunwok
Source: publisher site journal article supplement (doi:10.1515/lingvan-2021-0062), 2022-05-09
Supplement: Supplementary file 1 [file j_lingvan-2021-0062_suppl.docx]

**Language list for Marley, Alexandra**

| **Language** | **ISO 639-3** | **Language family** | **Alternate names/spelling** |
| --- | --- | --- | --- |
| Bininj Kunwok | gup | Gunwinyguan | Bininj Gunwok, Kunwinjku, Kuninjku, Gunwinggu, Gundjeihmi, Kundjeyhmi, Kundedjnjenghmi, Kune, Mayali, Maiali |
| Amurdak | amg | Iwaidjan | Amurdag, Amurag, Amarag |
| Rembarrnga | rmb | Gunwinyguan |  |
| Dalabon | ngk | Gunwinyguan | Dangbon, Ngalkbun, Buin, Boun, Buan, Gundangbon, Ngalabon, Bouin, Buwan, Nalabon |
| Erre | err | Giimbuyu |  |
| Iwaidja | ibd | Iwaidjan |  |
| Gaagudju | gbu | Gaagudju | Gagadu, gaguju, Kakadu |
| Arabana | ard | Karnic | Arabuna |
| Worora | wro | Wororan | Worrorra |
| Wajarri | wbv | Kartu | Watjarri, Watjari, Wadjari, Wadjeri |
| Nhanta | nha | Nhanda-Nhanhagardi (Kartu?) | Nhanta, Nhandi |
| Warlpiri | wbp | Ngarrkic (Ngumpin-Yapa) |  |
| Yir-Yoront | yyr | Paman |  |
|  |  |  |  |
|  |  |  |  |
|  |  |  |  |
|  |  |  |  |
|  |  |  |  |
|  |  |  |  |
